# Supplementary material for: Dosimetric evaluation of radionuclides for VCAM-1-targeted radionuclide therapy of early brain metastases
Source: PubMed Central journal article supplement — Theranostics. 2018 Jan 1;8(1):292–303. doi: 10.7150/thno.22217 (PMC5743475; doi:10.7150/thno.22217), 2018-01-01
Supplement: thnov08p0292s1.pdf [file thnov08p0292s1.pdf]

## Supplementary Material

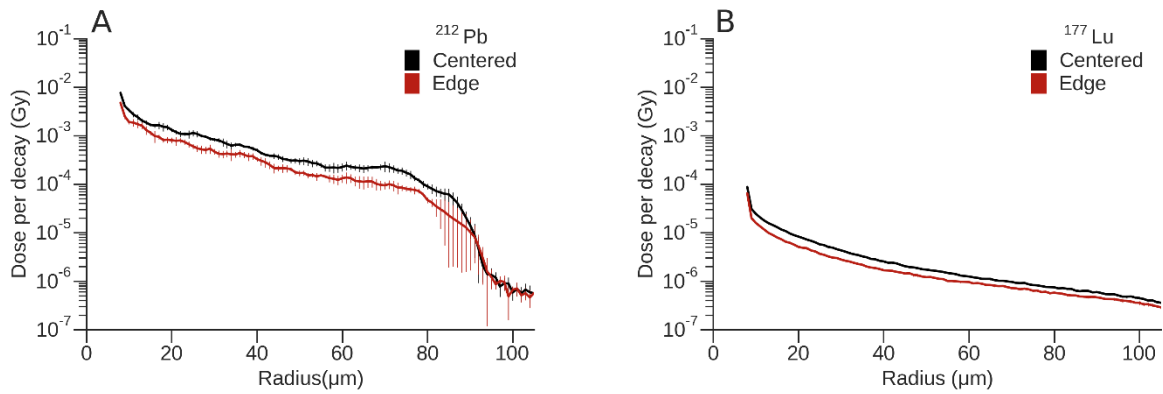

**Supplementary Figure 1.** Variation of dose per event as a function of detector position for (A)  $^{177}\text{Lu}$  and (B)  $^{212}\text{Pb}$  for a vessel of diameter 15  $\mu\text{m}$  and active length 100  $\mu\text{m}$ . Centered corresponds to detector being placed at the centre of the vessel and edge refers to a 50  $\mu\text{m}$  shift along the vessel, such that the center of the detector region is at the edge of the active region.

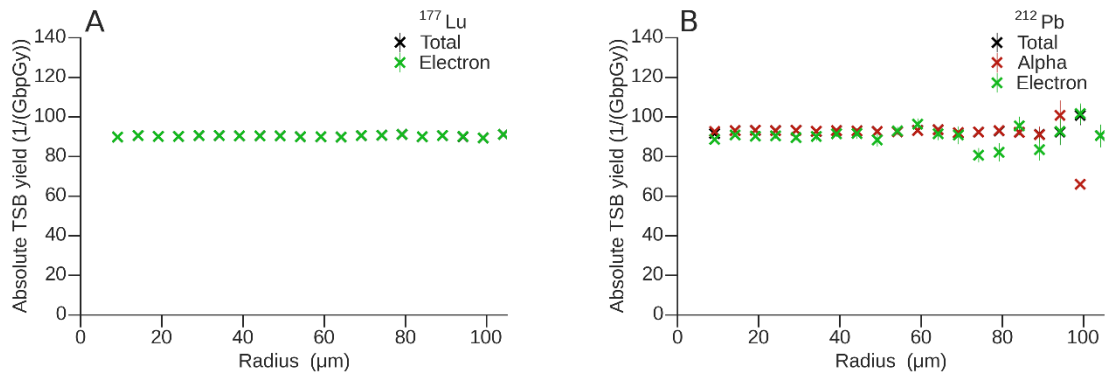

**Supplementary Figure 2.** Total strand break yields obtained for (A)  $^{177}\text{Lu}$  and (B)  $^{212}\text{Pb}$ .
